# Supplementary material
Source: PubMed Central journal article supplement (PMC5589337)
Supplement: NIHMS901168-supplement-S1.pdf [file NIHMS901168-supplement-S1.pdf]

# ADVANCED BIOSYSTEMS

## Supporting Information

for *Adv. Biosys.*, DOI: 10.1002/adbi.201700054

### Integrated Microfluidic System for Gene Silencing and Cell Migration

*Zongbin Liu, Xin Han, Qing Zhou, Rui Chen, Shelby Fruge, Myeong Chan Jo, Yuan Ma, Ziyin Li, Kenji Yokoi,\* and Lidong Qin\**

## Supporting Information

**Integrated microfluidic system for gene silencing and cell migration**

Zongbin Liu, Xin Han, Qing Zhou, Rui Chen, Shelby Fruge, Myeong Chan Jo, Yuan Ma, Ziyin Li, Kenji Yokoi\*, and Lidong Qin\*

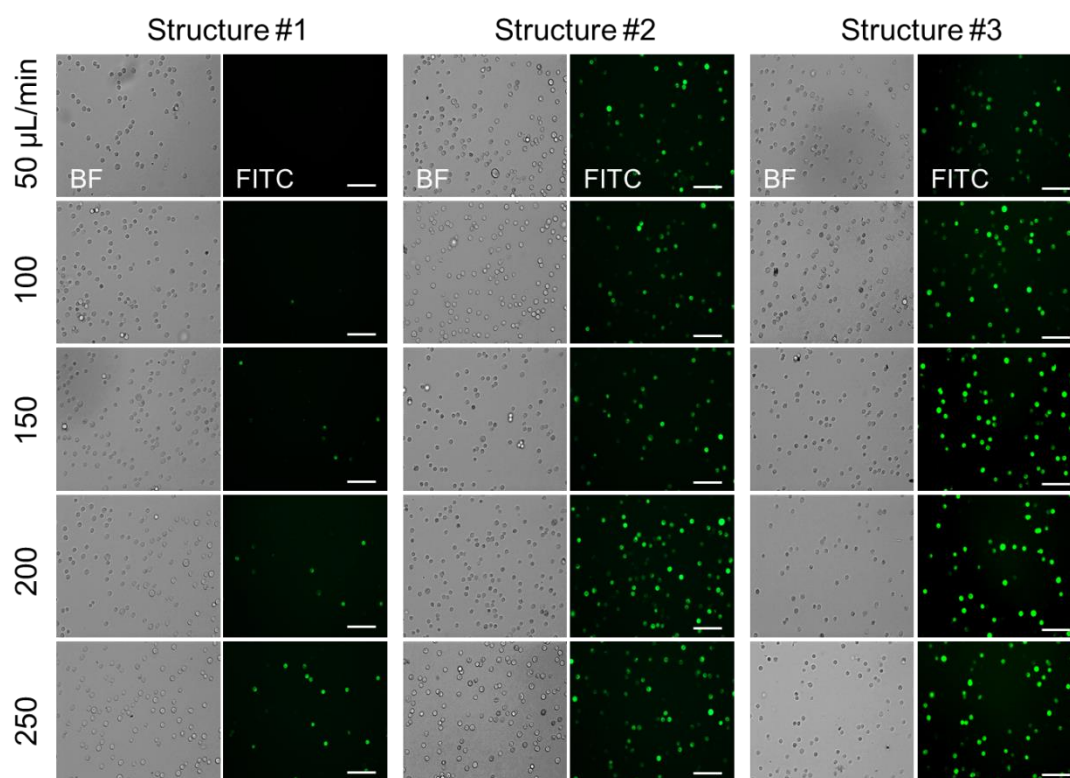

Figure S1. Images of FITC-dextran (70K) delivered cells using different delivery structures. Scale bar, 100  $\mu\text{m}$ .

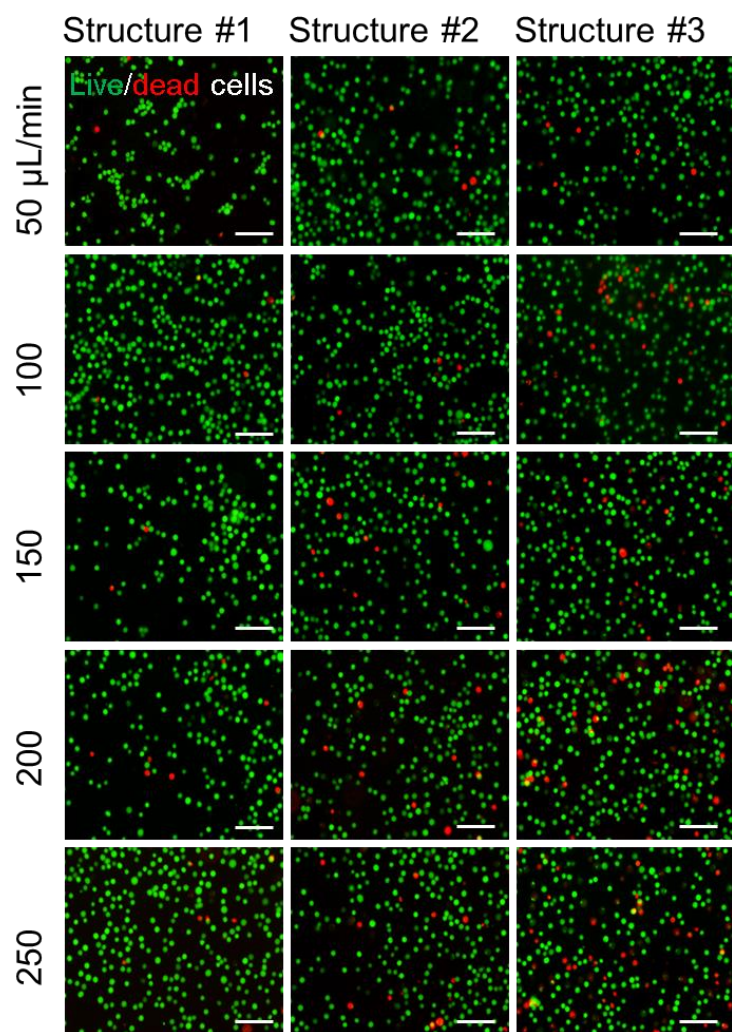

Figure S2. Images of live/dead staining of delivered cells using different delivery structures and flow rates. Green dots represent live cells and red dots indicate dead cells. Scale bar, 100  $\mu\text{m}$ .

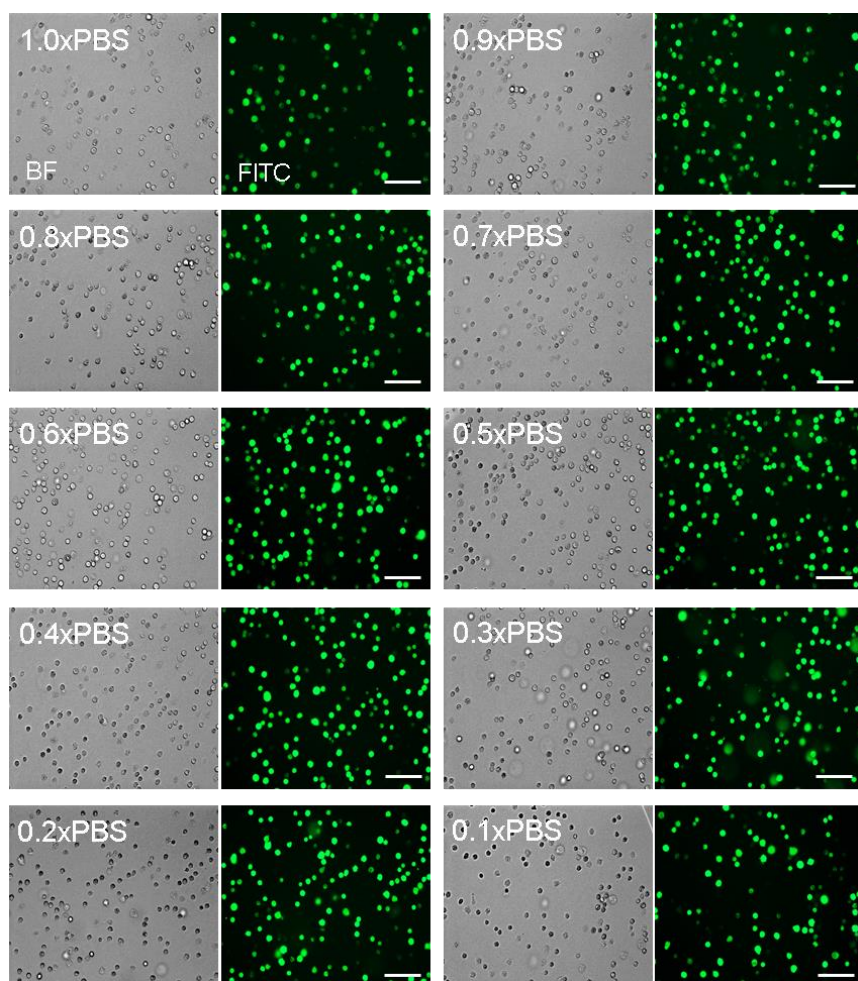

Figure S3. Images of FITC-dextran (70K) delivered cells in different PBS solutions. Scale bar, 100  $\mu\text{m}$ .

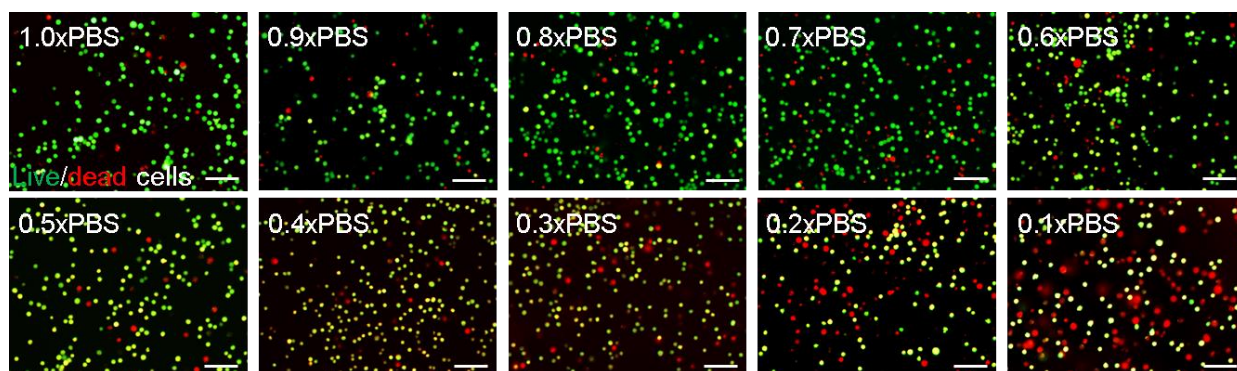

Figure S4. Images of live/dead staining of delivered in different PBS solutions. Green dots represent live cells and red dots indicate dead cells. Scale bar, 100  $\mu\text{m}$ .

Movie S1. Cell passage through the structure #1.

Movie S2. Cell passage through the structure #2.

Movie S3. Cell passage through the structure #3.

Movie S4. Migration of control MDA-MB-231-GFP cells in the presence of 10-20% FBS gradient.

Movie S5. Migration of MDA-MB-231-GFP cells, knocked down by siRNA CFL-1 in the presence of 10-20% FBS gradient.
